# Supplementary material
Source: publisher site journal article supplement (https://www.dovepress.com/article/441179)
Supplement: Supplementary file 1 [file get_supplementary_file.php]

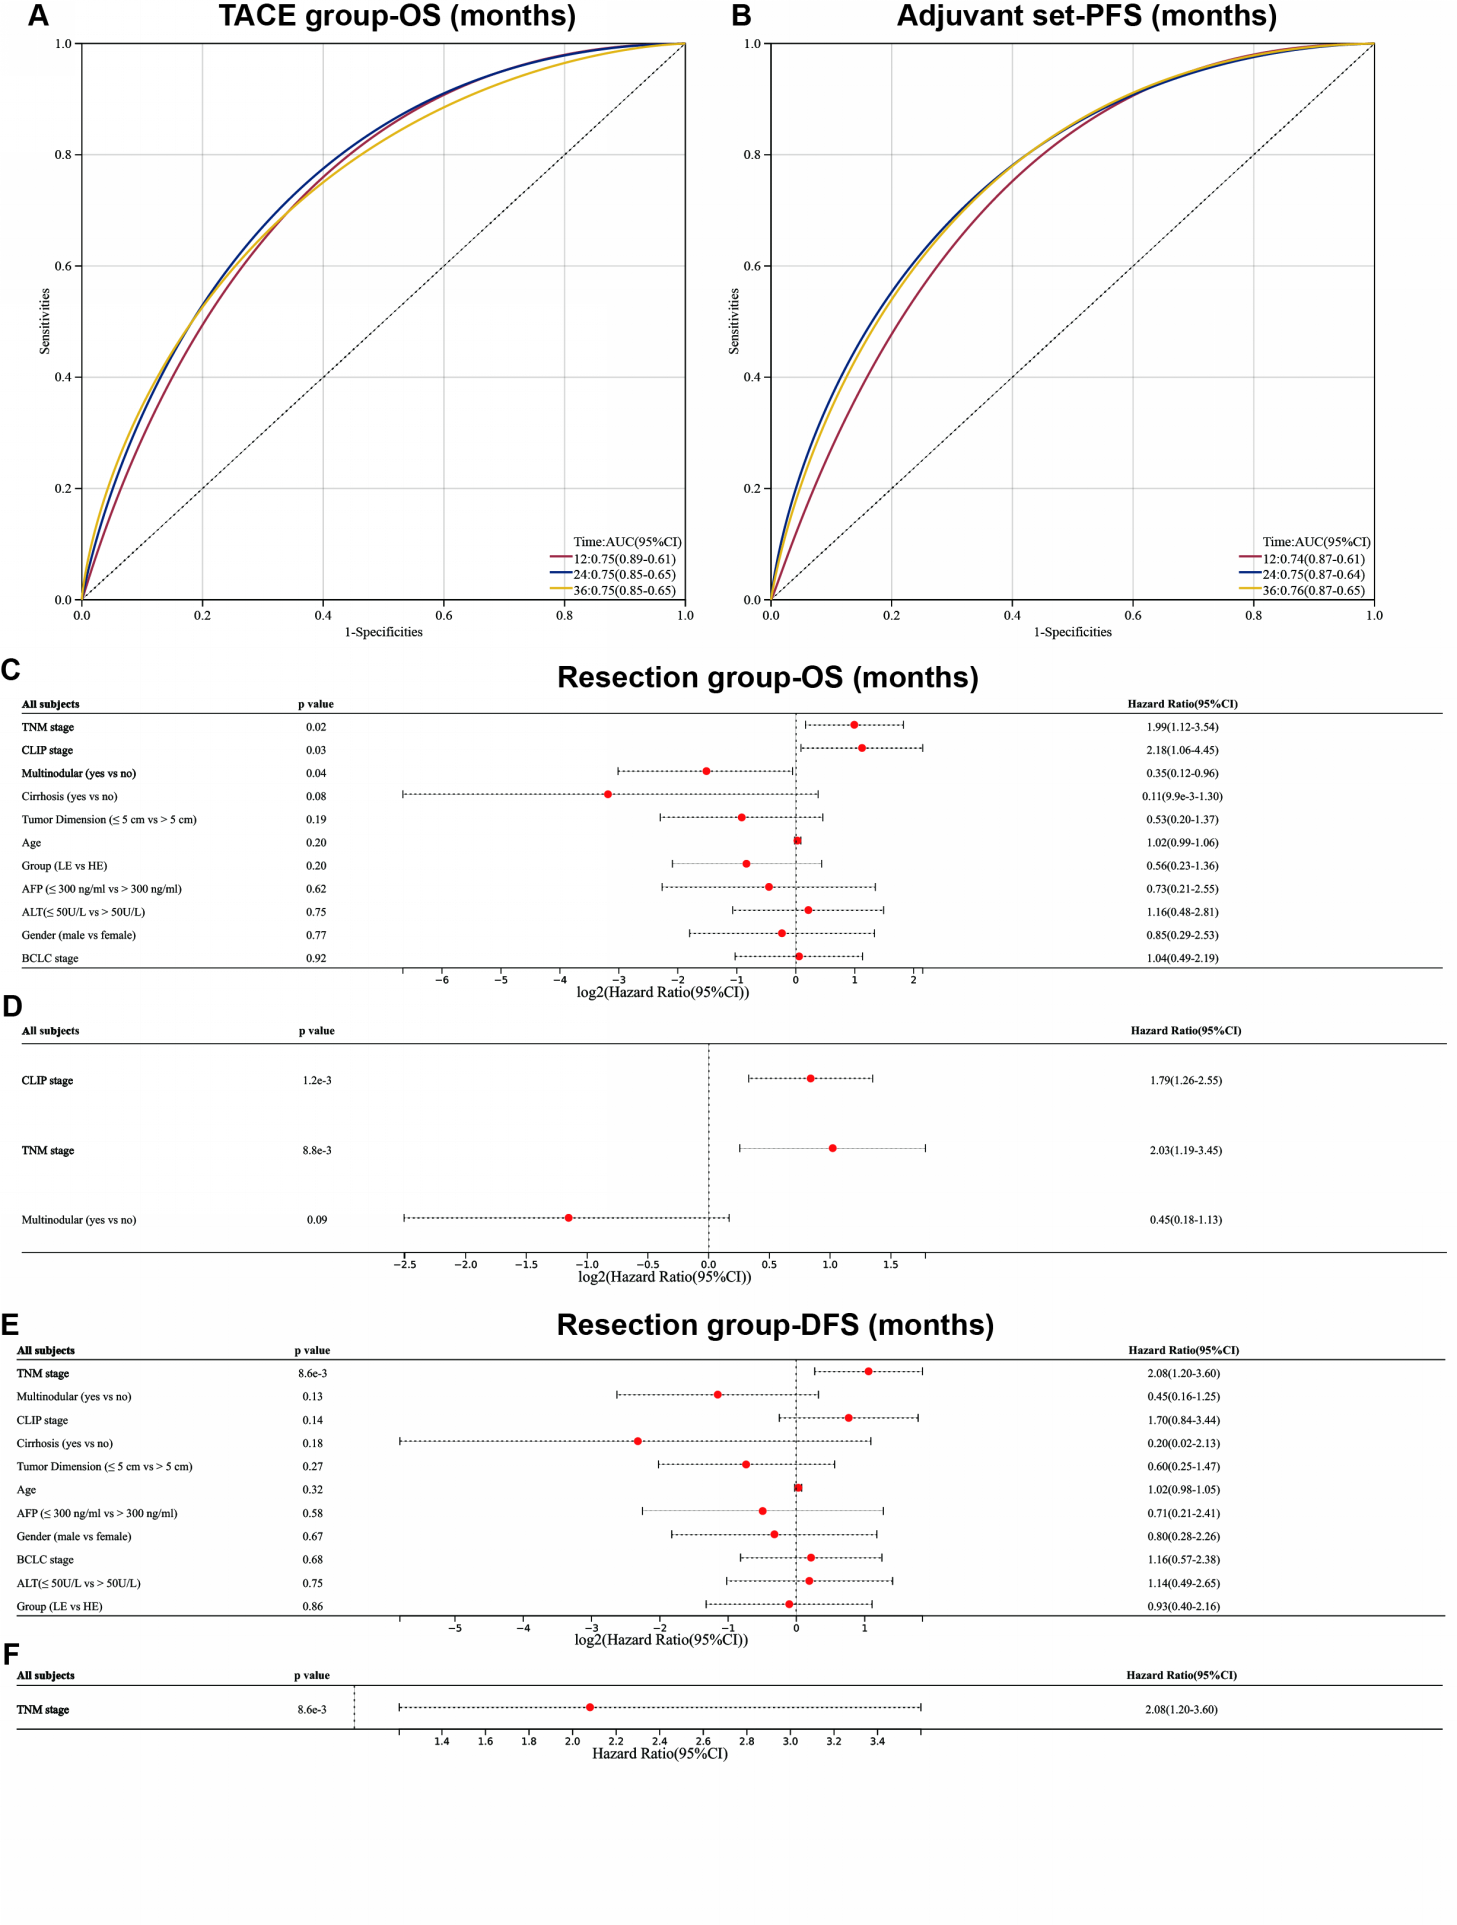


**Supplementary Figure 1** Evaluation for the predictive ability of prognosis by receiver operating characteristic curves (ROC) analysis, and evaluate the factors influencing the prognosis in the resection group. The ROC of our model for predicting 12, 24, 36 months overall survival rates in TACE group **(A)** and 12, 24, 36 months progression-free survival rates in adjuvant set **(B)**. Univariate **(C)** and multivariate **(D)** analysis to evaluate the factors influencing the OS of patients in the resection group. Univariate **(E)** and multivariate **(F)** analysis to evaluate the factors influencing the DFS of patients in the resection group. TACE, transarterial chemoembolization; AUC, area under curve; OS, overall survival; DFS, disease free survival; LE, low effectiveness; HE, high effectiveness; AFP, alpha fetoprotein; BCLC, Barcelona Clinic Liver Cancer; ECOG, Eastern Cooperative Oncology Group; TBIL, total bilirubin; ALT, alanine aminotransferase; AST, aspartate aminotransferase; ALB, albumin; CLIP, Cancer of the Liver Italian Program; CI, confidence interval. Bolded text indicates statistical significance (*p* < 0.05).


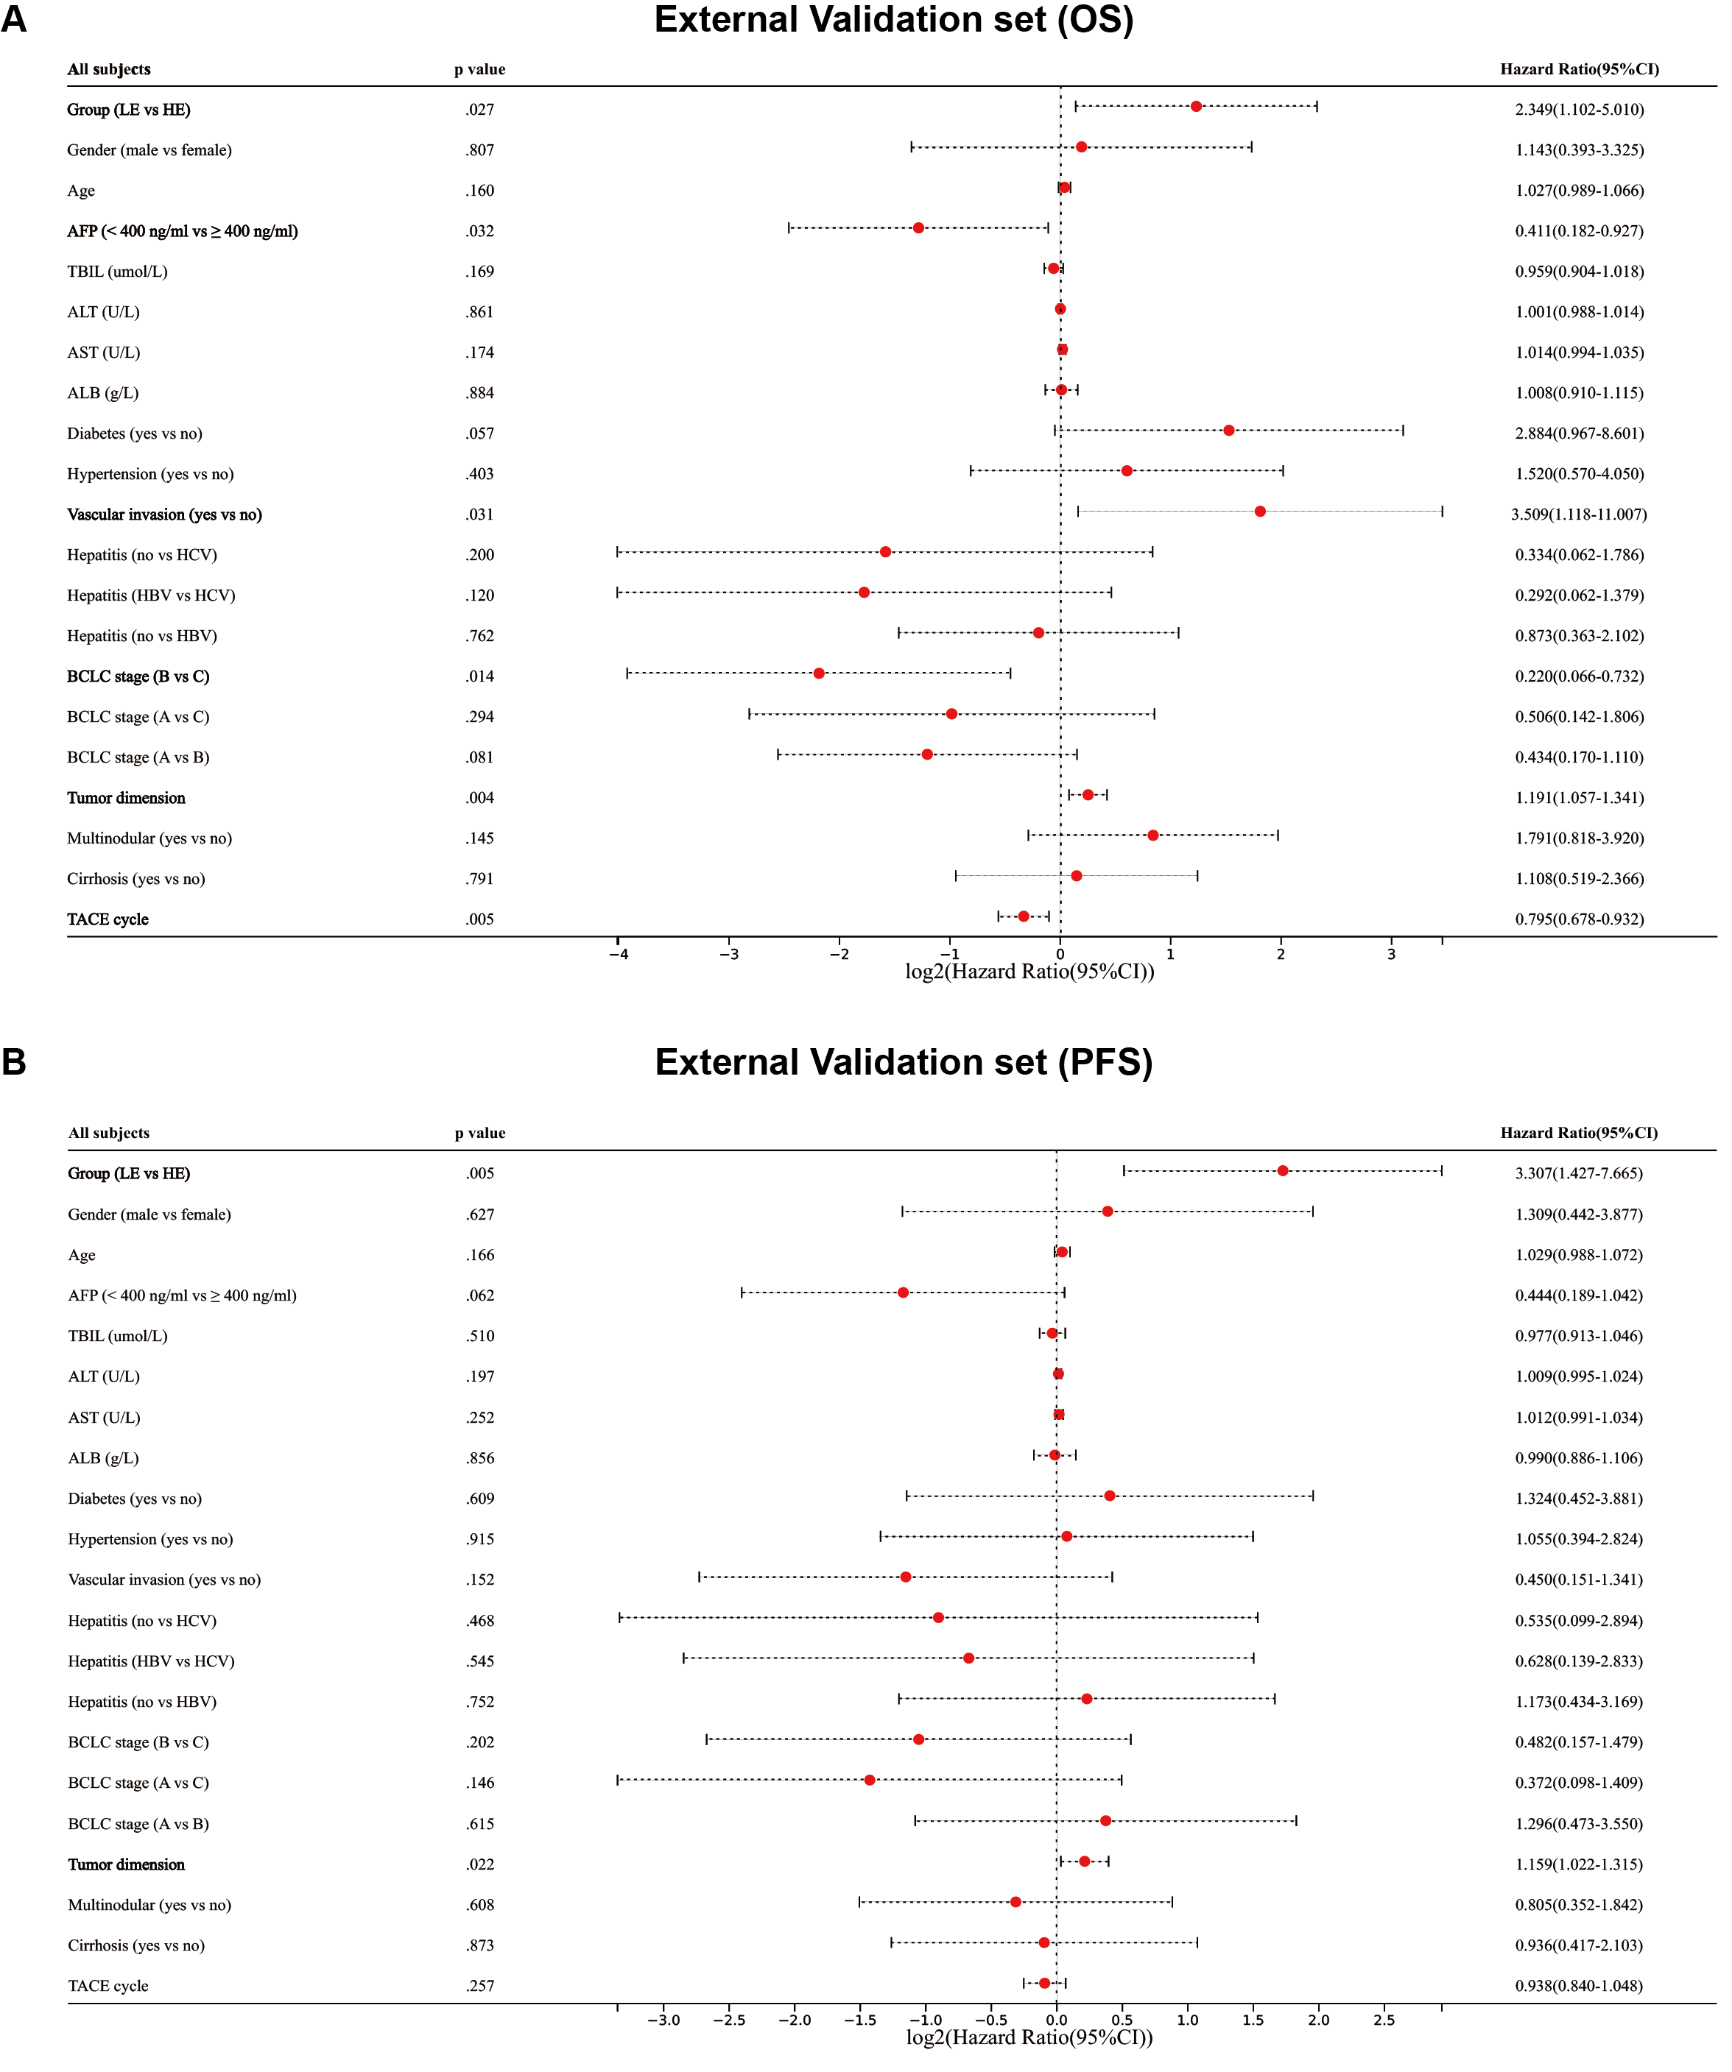


**Supplementary Figure 2** Univariate analysis to evaluate the factors influencing overall survival **(A)** and progression-free survival **(B)** of patients undergoing TACE in external validation set. LE, low effectiveness; HE, high effectiveness; AFP, alpha fetoprotein; BCLC, Barcelona Clinic Liver Cancer; TACE, transarterial chemoembolization; TBIL, total bilirubin; ALT, alanine aminotransferase; AST, aspartate aminotransferase; ALB, albumin; OS, overall survival; DFS, disease free survival; CI, confidence interval. Bolded text indicates statistical significance (*p* < 0.05).


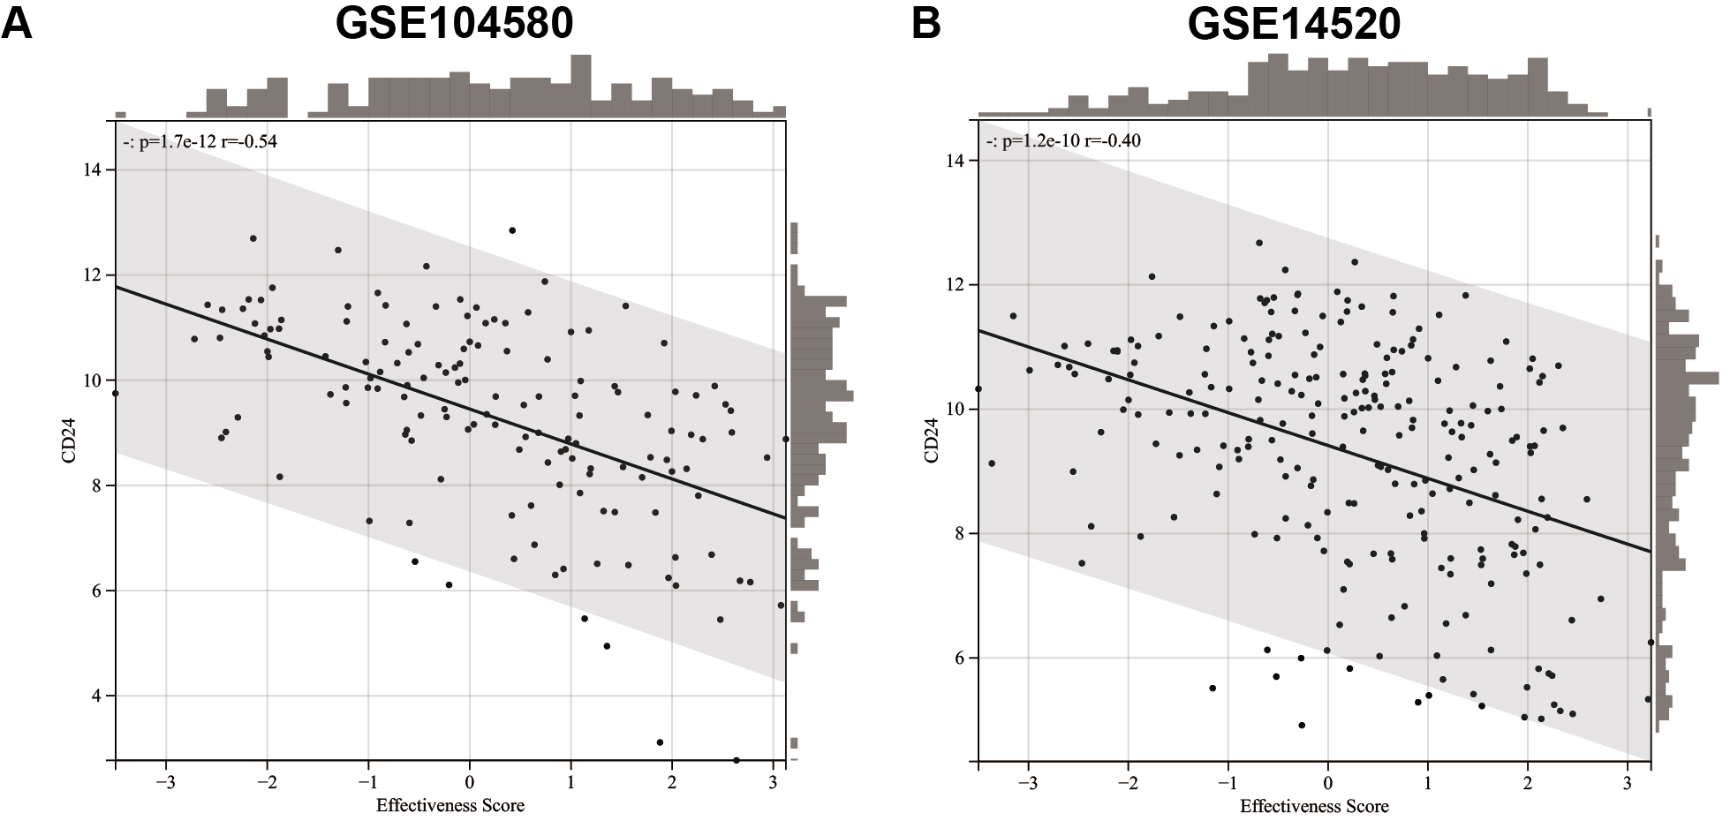


**Supplementary Figure 3** Correlation analysis to evaluate the relationship between the expression of CD24 and effectiveness score. There was a significant negative correlation between the expression of CD24 and the effectiveness score in **(A)** GSE104580 and **(B)** GSE14520.
